# Supplementary material
Source: Royal Society of Chemistry journal article supplement (doi:10.1039/d5fo04563k)
Supplement: d5fo04563k3.pdf [file d5fo04563k3.pdf]

**Supplementary Table 1.** Growth-associated variables and relative organ weights in 11 weeks old animals.

| BODY                                   | Male         |               |              |               | Female       |              |              |               |
|----------------------------------------|--------------|---------------|--------------|---------------|--------------|--------------|--------------|---------------|
|                                        | REF          | FP            | REF OVA      | FP OVA        | REF          | FP           | REF OVA      | FP OVA        |
| <b>Final body weight (g)</b>           | 367.5 ± 8.53 | 374.5 ± 18.52 | 365.2 ± 7.82 | 388.0 ± 16.15 | 263.7 ± 5.95 | 254.7 ± 7.92 | 258.3 ± 5.49 | 245.3 ± 12.02 |
| <b>BMI</b>                             | 0.74 ± 0.02  | 0.78 ± 0.02   | 0.76 ± 0.02  | 0.75 ± 0.02   | 0.62 ± 0.01  | 0.60 ± 0.01  | 0.60 ± 0.01  | 0.60 ± 0.01   |
| <b>Lee index</b>                       | 326.6 ± 3.89 | 331.5 ± 8.39  | 327.0 ± 3.44 | 321.6 ± 4.77  | 312.3 ± 4.73 | 304.6 ± 3.80 | 307.7 ± 2.43 | 309.4 ± 2.53  |
| <b>ORGANS</b>                          |              |               |              |               |              |              |              |               |
| <b>Thymus (%)</b>                      | 0.19 ± 0.01  | 0.17 ± 0.01   | 0.21 ± 0.01  | 0.20 ± 0.01#  | 0.27 ± 0.01  | 0.23 ± 0.01* | 0.31 ± 0.02  | 0.24 ± 0.01*  |
| <b>Spleen (%)</b>                      | 0.26 ± 0.01  | 0.25 ± 0.00   | 0.26 ± 0.01  | 0.29 ± 0.02#  | 0.29 ± 0.02  | 0.29 ± 0.01  | 0.35 ± 0.03  | 0.32 ± 0.01   |
| <b>Submaxillary salivary gland (%)</b> | 0.16 ± 0.01  | 0.16 ± 0.01   | 0.16 ± 0.01  | 0.15 ± 0.01   | 0.19 ± 0.01  | 0.18 ± 0.01  | 0.17 ± 0.00  | 0.19 ± 0.01*  |
| <b>Stomach (%)</b>                     | 0.50 ± 0.02  | 0.47 ± 0.01   | 0.51 ± 0.02  | 0.49 ± 0.01   | 0.57 ± 0.04  | 0.52 ± 0.03  | 0.59 ± 0.04  | 0.61 ± 0.04   |
| <b>Small Intestine (%)</b>             | 2.53 ± 0.10  | 2.53 ± 0.03   | 2.54 ± 0.09  | 2.43 ± 0.06   | 3.05 ± 0.06  | 3.42 ± 0.24  | 3.05 ± 0.32  | 2.99 ± 0.16   |
| <b>Caecum (%)</b>                      | 0.95 ± 0.10  | 0.85 ± 0.04   | 0.97 ± 0.08  | 0.95 ± 0.05   | 1.00 ± 0.07  | 0.85 ± 0.04  | 0.78 ± 0.11  | 0.93 ± 0.05   |
| <b>Liver (%)</b>                       | 3.82 ± 0.12  | 3.99 ± 0.11   | 3.77 ± 0.10  | 4.02 ± 0.04*  | 3.76 ± 0.09  | 3.87 ± 0.31  | 3.79 ± 0.20  | 3.94 ± 0.14   |
| <b>Kidney (%)</b>                      | 0.35 ± 0.02  | 0.34 ± 0.01   | 0.37 ± 0.01  | 0.33 ± 0.01*  | 0.40 ± 0.01  | 0.38 ± 0.02  | 0.44 ± 0.04  | 0.45 ± 0.04   |
| <b>Brain (%)</b>                       | 0.47 ± 0.01  | 0.44 ± 0.01   | 0.48 ± 0.01  | 0.48 ± 0.01   | 0.64 ± 0.01  | 0.69 ± 0.03  | 0.68 ± 0.01# | 0.70 ± 0.04   |
| <b>Heart (%)</b>                       | 0.30 ± 0.01  | 0.31 ± 0.01   | 0.31 ± 0.01  | 0.30 ± 0.01   | 0.37 ± 0.03  | 0.34 ± 0.01  | 0.33 ± 0.01  | 0.37 ± 0.01   |

Data corresponding to relative organ weights are expressed as a percentage of body weight expressed as mean ± SEM (n = 3-6). REF groups were those born from mothers fed reference diet; FP groups were those born from mothers fed fiber- and polyphenol-enriched diet; OVA groups were those that were immunized at week 7 of life. Statistical differences: \* p < 0.05 vs. reference diet in the same immunized condition; # p < 0.05 vs. not immunized in the same diet condition.
