# Supplementary material
Source: Royal Society of Chemistry journal article supplement (doi:10.1039/d5fo04563k)

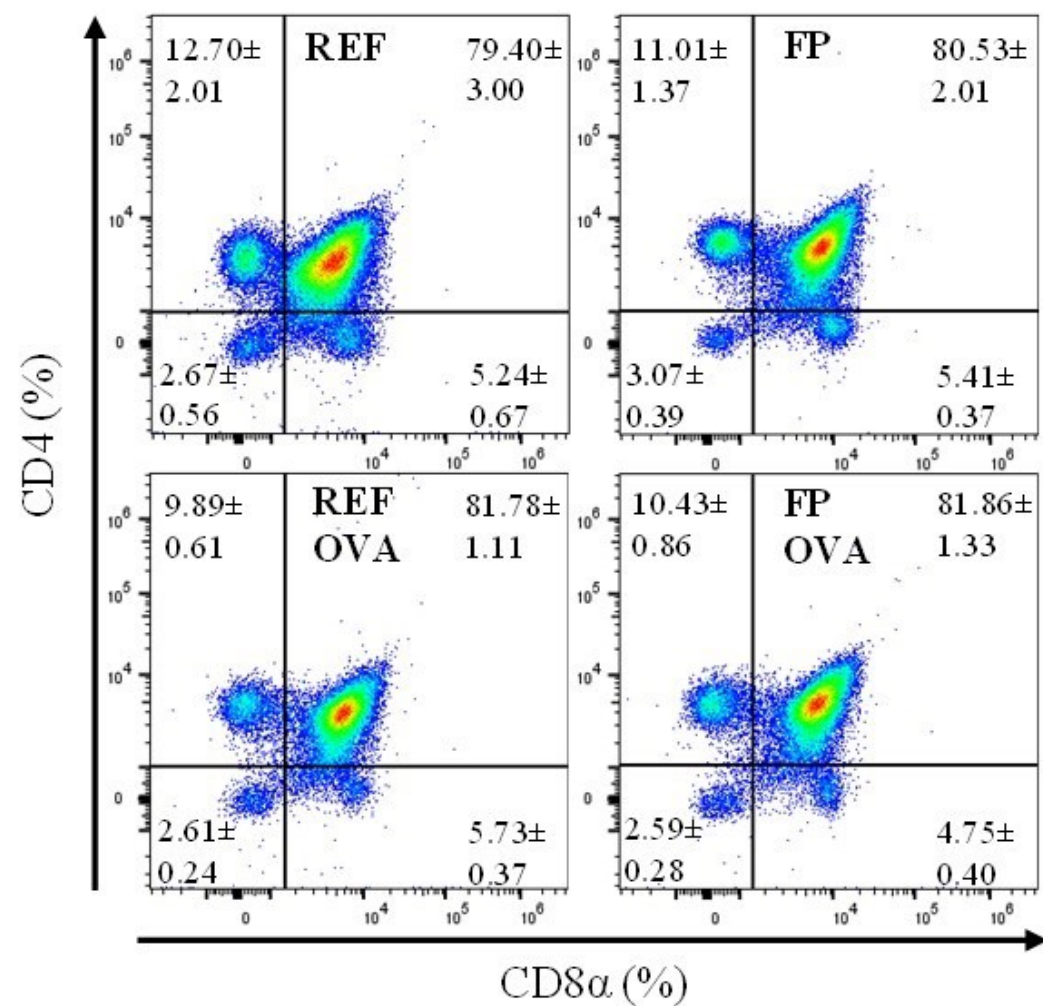

Supplement: d5fo04563k2.pdf [file d5fo04563k2.pdf]
